# Supplementary material
Source: Springer Nature journal article supplement (https://www.springermedizin.de/resource/supplementary/12876_2008_313_MOESM1_ESM.pdf/9439144)

## Factor Loadings Plot

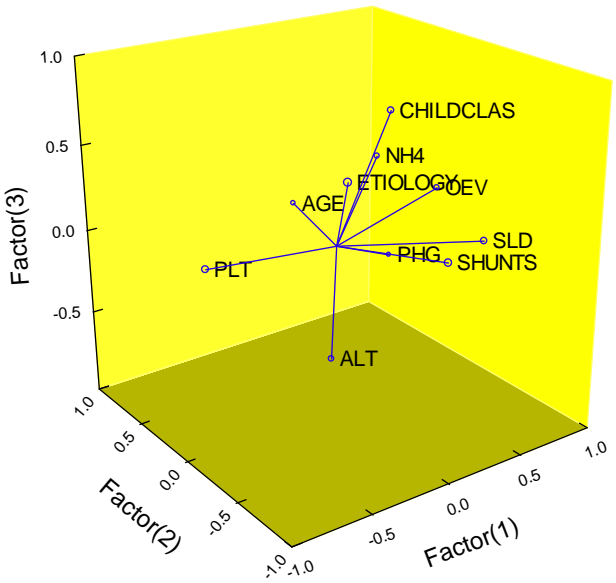

| Factors  | 1      | 2      | 3      |
|----------|--------|--------|--------|
| AGE      | 0.038  | -0.573 | -0.329 |
| ETIOLOGY | 0.077  | 0.610  | -0.263 |
| CHILD    | 0.608  | 0.152  | -0.483 |
| PLTs     | -0.692 | 0.051  | -0.251 |
| SLD      | 0.660  | 0.250  | 0.377  |
| PHG      | 0.395  | -0.629 | 0.222  |
| LSS      | 0.349  | 0.512  | 0.357  |
| NH4      | 0.530  | -0.260 | -0.314 |
| ALT      | -0.284 | -0.297 | 0.535  |
| EV       | 0.716  | -0.174 | 0.013  |

Supplement: MOESM1 [file 9439144]
